# Supplementary material
Source: PubMed Central journal article supplement (PMC7954893)
Supplement: NIHMS1645008-supplement-1.pdf [file NIHMS1645008-supplement-1.pdf]

Table S1. Sociodemographic characteristics and acculturation measures by site location

|                                      | Total<br>(n=227) | Chinatown, MA<br>(n=111) | Quincy, MA<br>(n=116) |
|--------------------------------------|------------------|--------------------------|-----------------------|
| <b>Age (years), mean (SD)</b>        | 32.7 (6.7)       | 33.7 (6.7)               | 31.8 (6.5)            |
| <b>Age at entry into US</b>          |                  |                          |                       |
| Median (IQR)                         | 24.0 (20.0-29.0) | 25.0 (21.0-32.0)         | 23.0 (19.0-27.1)      |
| Range                                | 5.0-44.2         | 5.0-43.0                 | 9.0-44.2              |
| <b>Length of US residence</b>        |                  |                          |                       |
| Median (IQR)                         | 7.0 (3.0-11.0)   | 7.0 (3.0-10.0)           | 7.0 (3.0-12.0)        |
| Range                                | 0.2-34.0         | 0.3-34.0                 | 0.2-26.0              |
| <b>Educational attainment, n (%)</b> |                  |                          |                       |
| < High School                        | 50 (22.1)        | 28 (25.2)                | 22 (19.1)             |
| High School                          | 83 (36.4)        | 44 (39.6)                | 39 (33.3)             |
| > High School                        | 93 (41.0)        | 39 (35.1)                | 54 (46.7)             |
| Don't know                           | 1 (0.5)          | 0 (0.0)                  | 1 (0.9)               |
| <b>Any English, n (%)</b>            |                  |                          |                       |
| Overall                              | 88 (38.8)        | 36 (32.4)                | 52 (44.8)             |
| With friends                         | 55 (24.2)        | 23 (20.7)                | 32 (27.6)             |
| At home                              | 20 (8.8)         | 10 (9.0)                 | 10 (8.6)              |

SD=standard deviation; IQR=interquartile range

Table S2. Summary of LCA statistical fit and entropy

| PCP classes | AIC   | BIC   | $\chi^2$ | G <sup>2</sup> | # estimated parameters | Log-likelihood | Entropy |
|-------------|-------|-------|----------|----------------|------------------------|----------------|---------|
| 2           | 1,747 | 1,812 | 1,045    | 178            | 19                     | -855           | 4.1     |
| 3           | 1,718 | 1,818 | 746      | 138            | 29                     | -830           | 4.0     |
| 4           | 1,717 | 1,851 | 153      | 117            | 39                     | -820           | 3.9     |
| 5           | 1,722 | 1,890 | 128      | 108            | 49                     | -812           | 3.9     |
| 6           | 1,727 | 1,929 | 112      | 92             | 59                     | -804           | 3.8     |
| 7           | 1,736 | 1,972 | 91       | 81             | 69                     | -800           | 3.8     |
| 8           | 1,747 | 2,017 | 86       | 75             | 79                     | -793           | 3.8     |

Table S3. Probability of product type usage by latent class

|    |                         | Usage prevalence,<br>n (%) | Posterior probabilities |                    |
|----|-------------------------|----------------------------|-------------------------|--------------------|
|    |                         |                            | High PCP users          | Moderate PCP users |
| P1 | Crème rinse/conditioner | 136 (65.4)                 | 0.79                    | 0.06               |
| P2 | Shampoo                 | 182 (89.7)                 | 0.99                    | 0.47               |
| P3 | Perfume/cologne         | 45 (21.8)                  | 0.27                    | 0.00               |
| P4 | Bar soap/body wash      | 192 (91.0)                 | 0.97                    | 0.66               |
| P5 | Liquid hand soap        | 182 (85.8)                 | 0.93                    | 0.51               |
| P6 | Lotion/moisturizer      | 152 (72.0)                 | 0.79                    | 0.40               |
| P7 | Colored cosmetics       | 55 (26.4)                  | 0.32                    | 0.03               |
| P8 | Sunscreen               | 99 (46.3)                  | 0.54                    | 0.10               |
| P9 | Nail polish             | 24 (11.5)                  | 0.14                    | 0.00               |

■ Moderate probability of usage (0.25-0.75)

■ High probability of usage (>0.75)

Table S4. Length of US residence and age at US entry as predictors of high PCP user versus moderate PCP user class\*.

|                      | Long-term US residence<br>OR (95% CI) | Early age at US entry<br>OR (95% CI) |
|----------------------|---------------------------------------|--------------------------------------|
| Model 1 <sup>a</sup> | 0.94 (0.44, 2.06)                     | 1.69 (0.82, 3.64)                    |
| Model 2 <sup>b</sup> | 0.73 (0.32, 1.69)                     | 1.62 (0.78, 3.50)                    |
| Model 3 <sup>c</sup> |                                       |                                      |

<sup>a</sup> unadjusted

<sup>b</sup> adjusted for age at US entry and site location

<sup>c</sup> adjusted for age at US entry, site location, length of US residence, and educational attainment

\*High PCP users class included 192 women, and moderate PCP users class included 35 women based on the latent class analyses conducted.

Table S5. Associations between length of US residence and age at US entry acculturation measures and individual product type usage

|                         | Long-term US residence<br>OR (95% CI) | Early age at US entry<br>OR (95% CI) |
|-------------------------|---------------------------------------|--------------------------------------|
| Crème rinse/conditioner | 0.92 (0.48, 1.79)                     | 1.04 (0.58, 1.89)                    |
| Shampoo                 | 0.68 (0.26, 1.76)                     | 0.60 (0.25, 1.48)                    |
| Perfume/cologne         | 1.33 (0.62, 2.82)                     | 1.01 (0.53, 1.94)                    |
| Bar soap/body wash      | 0.69 (0.25, 1.92)                     | 0.86 (0.34, 2.20)                    |
| Liquid hand soap        | 1.48 (0.57, 3.83)                     | 1.97 (0.88, 4.39)                    |
| Lotion/moisturizer      | 0.71 (0.36, 1.39)                     | 0.58 (0.31, 1.08)                    |
| Colored cosmetics       | 0.55 (0.26, 1.16)                     | 2.31 (1.22, 4.38)                    |
| Sunscreen               | 1.22 (0.66, 2.25)                     | 0.67 (0.39, 1.14)                    |
| Nail polish             | 0.92 (0.35, 2.41)                     | 1.06 (0.45, 2.52)                    |

Models adjusted for age at U.S. entry and site location.

Table S6. Associations between English language acculturation measures and individual product type usage using complete dataset (without imputations)

|                         | Speak English (any versus none) |                             |                        |
|-------------------------|---------------------------------|-----------------------------|------------------------|
|                         | Overall<br>OR (95% CI)          | With friends<br>OR (95% CI) | At home<br>OR (95% CI) |
| Crème rinse/conditioner | 2.03 (0.93, 4.60)               | 2.65 (1.08, 7.09)           | 1.24 (0.36, 5.05)      |
| Shampoo                 | 3.50 (0.96, 16.94)              | 2.59 (0.63, 17.63)          | 0.59 (0.12, 4.28)      |
| Perfume/cologne         | 2.96 (1.16, 7.94)               | 3.70 (1.45, 9.70)           | 1.41 (0.29, 5.28)      |
| Bar soap/body wash      | 3.94 (1.05, 19.39)              | NE                          | NE                     |
| Liquid hand soap        | 3.76 (1.26, 13.09)              | 4.29 (1.09, 28.64)          | NE                     |
| Lotion/moisturizer      | 1.17 (0.53, 2.62)               | 0.73 (0.31, 1.74)           | 0.66 (0.20, 2.39)      |
| Colored cosmetics       | 1.65 (0.72, 3.77)               | 0.95 (0.39, 2.22)           | 0.81 (0.19, 2.89)      |
| Sunscreen               | 1.87 (0.91, 3.91)               | 1.20 (0.55, 2.6)            | 1.69 (0.52, 5.65)      |
| Nail polish             | 2.53 (0.84, 8.33)               | 6.60 (2.19, 21.75)          | 6.99 (1.66, 30.02)     |

All models adjusted for age at US entry, site location, length of US residence, and educational attainment.  
NE: non-estimable – model could not converge because usage groups were unbalance

Table S7. Associations between length of US residence and age at US entry acculturation measures and individual product type usage using complete dataset (without imputations)

|                         | Long-term US residence<br>OR (95% CI) | Early age at US entry<br>OR (95% CI) |
|-------------------------|---------------------------------------|--------------------------------------|
| Crème rinse/conditioner | 1.02 (0.47, 2.28)                     | 1.09 (0.56, 2.13)                    |
| Shampoo                 | 0.82 (0.27, 2.59)                     | 0.58 (0.20, 1.57)                    |
| Perfume/cologne         | 1.10 (0.42, 2.81)                     | 1.46 (0.63, 3.47)                    |
| Bar soap/body wash      | 0.54 (0.16, 1.93)                     | 1.13 (0.38, 3.40)                    |
| Liquid hand soap        | 1.10 (0.38, 3.46)                     | 2.72 (1.14, 7.02)                    |
| Lotion/moisturizer      | 0.62 (0.28, 1.37)                     | 0.63 (0.31, 1.26)                    |
| Colored cosmetics       | 0.51 (0.22, 1.160)                    | 3.56 (1.70, 7.83)                    |
| Sunscreen               | 1.26 (0.61, 2.65)                     | 0.81 (0.43, 1.50)                    |
| Nail polish             | 0.68 (0.21, 2.06)                     | 1.59 (0.59, 4.56)                    |

Models adjusted for age at U.S. entry and site location.
